# Supplementary material for: Design and analysis of a 2D grapheneplus (G+)-based gas sensor for the detection of multiple organic gases
Source: Royal Society of Chemistry journal article supplement (doi:10.1039/d3cp03081d), 2023-01-01
Supplement: d3cp03081d1.pdf [file d3cp03081d1.pdf]

## **Design and analysis of 2D grapheneplus (G+) based gas sensor for the detection of multiple organic gases**

Danfeng Qin<sup>a</sup>, Tong Chen<sup>a,b\*</sup>, Luzhen Xie<sup>a</sup>, Ning Yang<sup>a</sup>,  
Cheng Luo<sup>a</sup>, Guanghui Zhou<sup>c</sup>

<sup>a</sup> School of Software Engineering, Jiangxi University of Science and Technology,  
Nanchang 330013, PR China

<sup>b</sup> State Key Laboratory of Surface Physics and Department of Physics, Fudan University, Shanghai  
200433, PR China

<sup>c</sup> Department of Physics, Key Laboratory for Low-Dimensional Structures and Quantum Manipulation  
(Ministry of Education), and Synergetic Innovation Center for Quantum Effects and Application of  
Hunan, Hunan Normal University, Changsha 410081 China.

\*E-mail: [tongchen\\_jxlg@163.com](mailto:tongchen_jxlg@163.com)

## Supporting Figures

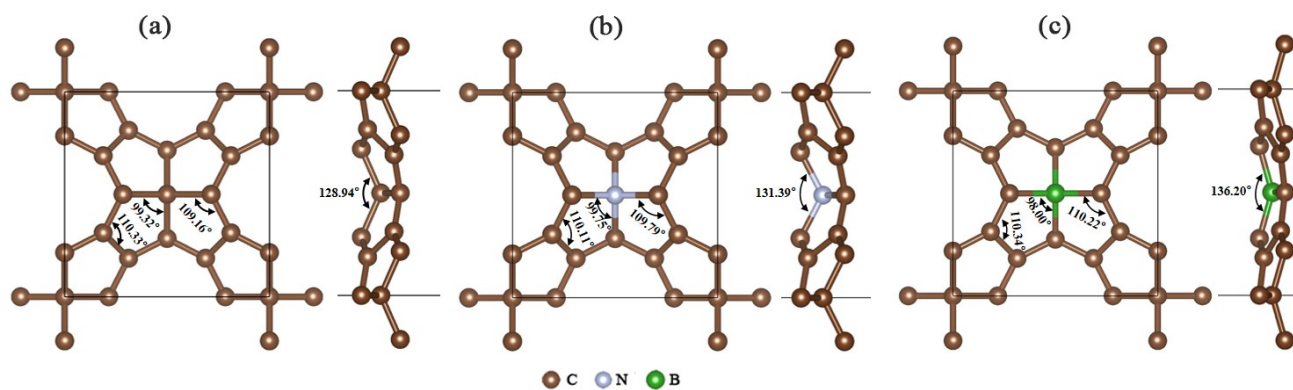

**Fig. S1** Top and side views of the (a)G+, (b)NG+ and (c)BG+ monolayers.

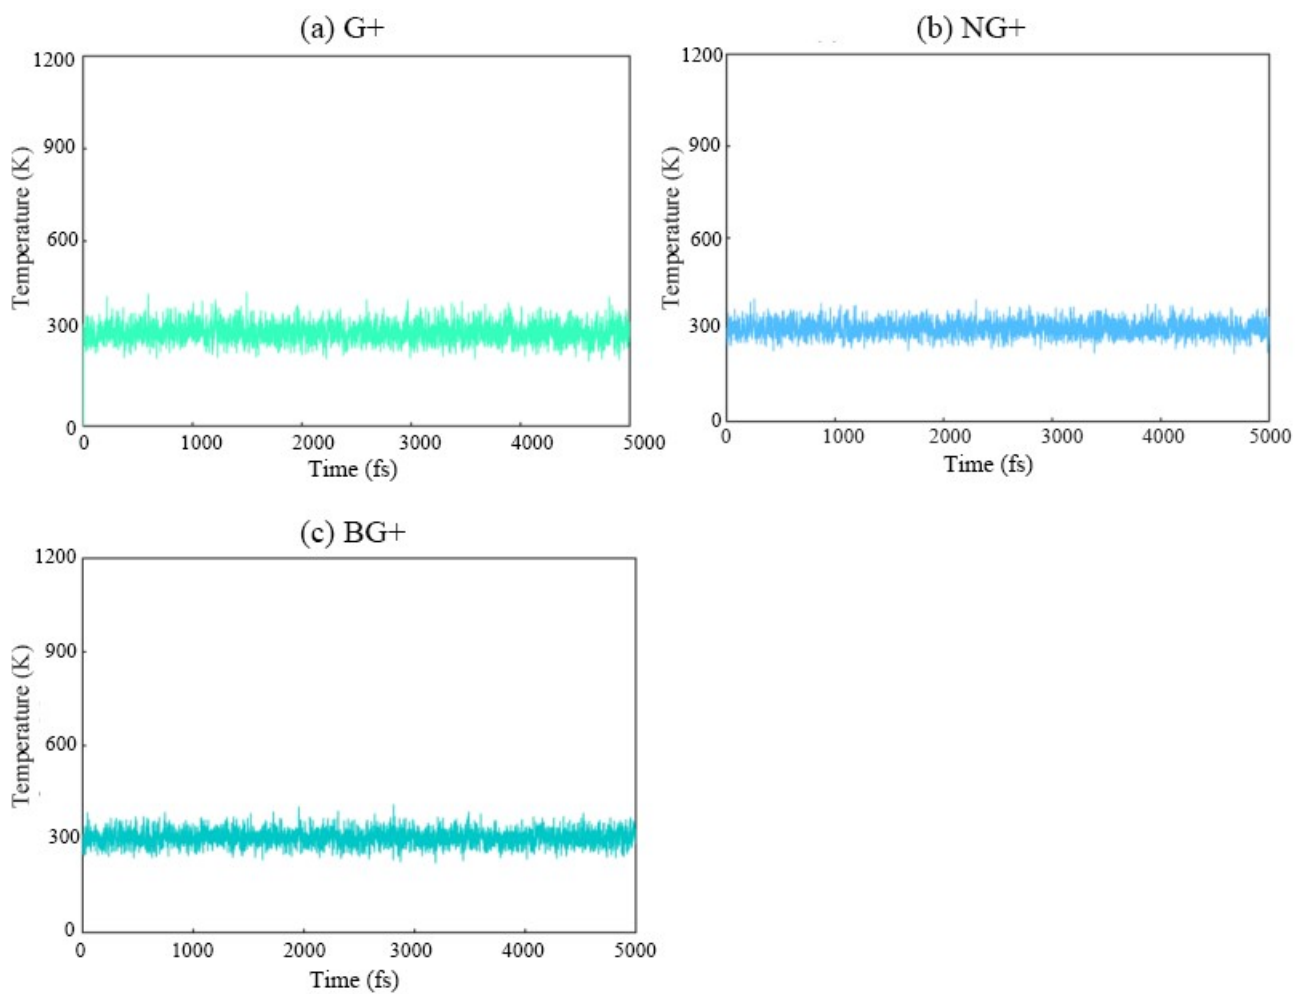

**Fig. S2** (a), (b) and (c) The temperature variation of the G+, NG+ and BG+ monolayers as a function

of molecular dynamics simulation steps at 300 K, respectively.

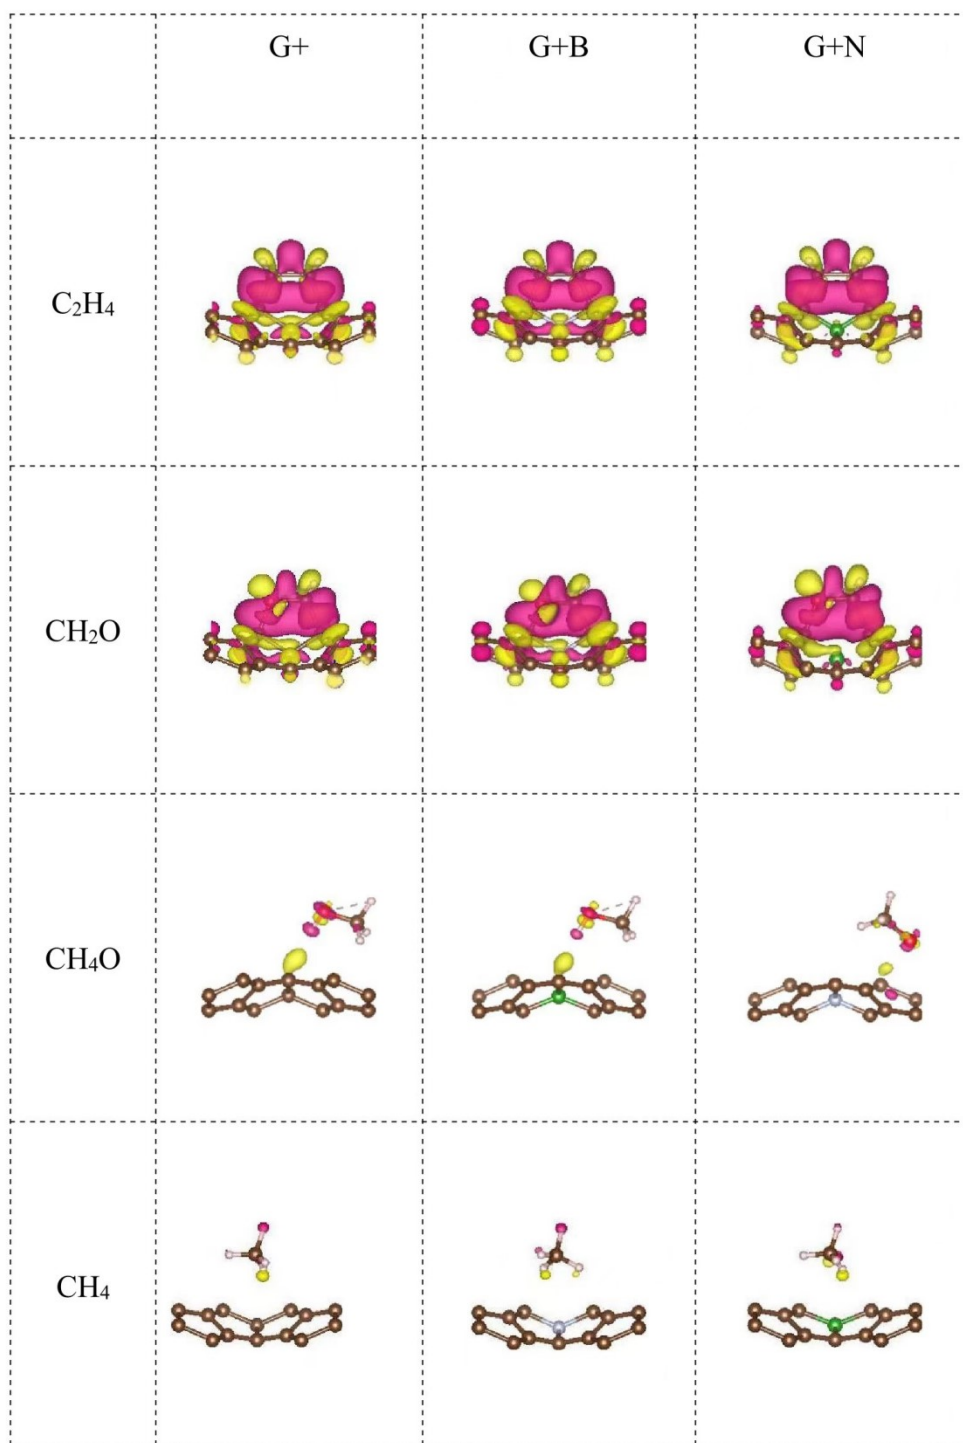

**Fig. S3** Difference charge density of the the G+, NG+ and BG+ monolayers adsorbed C<sub>2</sub>H<sub>4</sub>, CH<sub>2</sub>O, CH<sub>4</sub>O and CH<sub>4</sub>.
